# Supplementary figures and images for: Genome-Wide Identification and Characterization of Olfactory Receptor Genes in Silver Sillago (Sillago sihama)
Source: MDPI journal article supplement (doi:10.3390/ani13071232), 2023-04-01

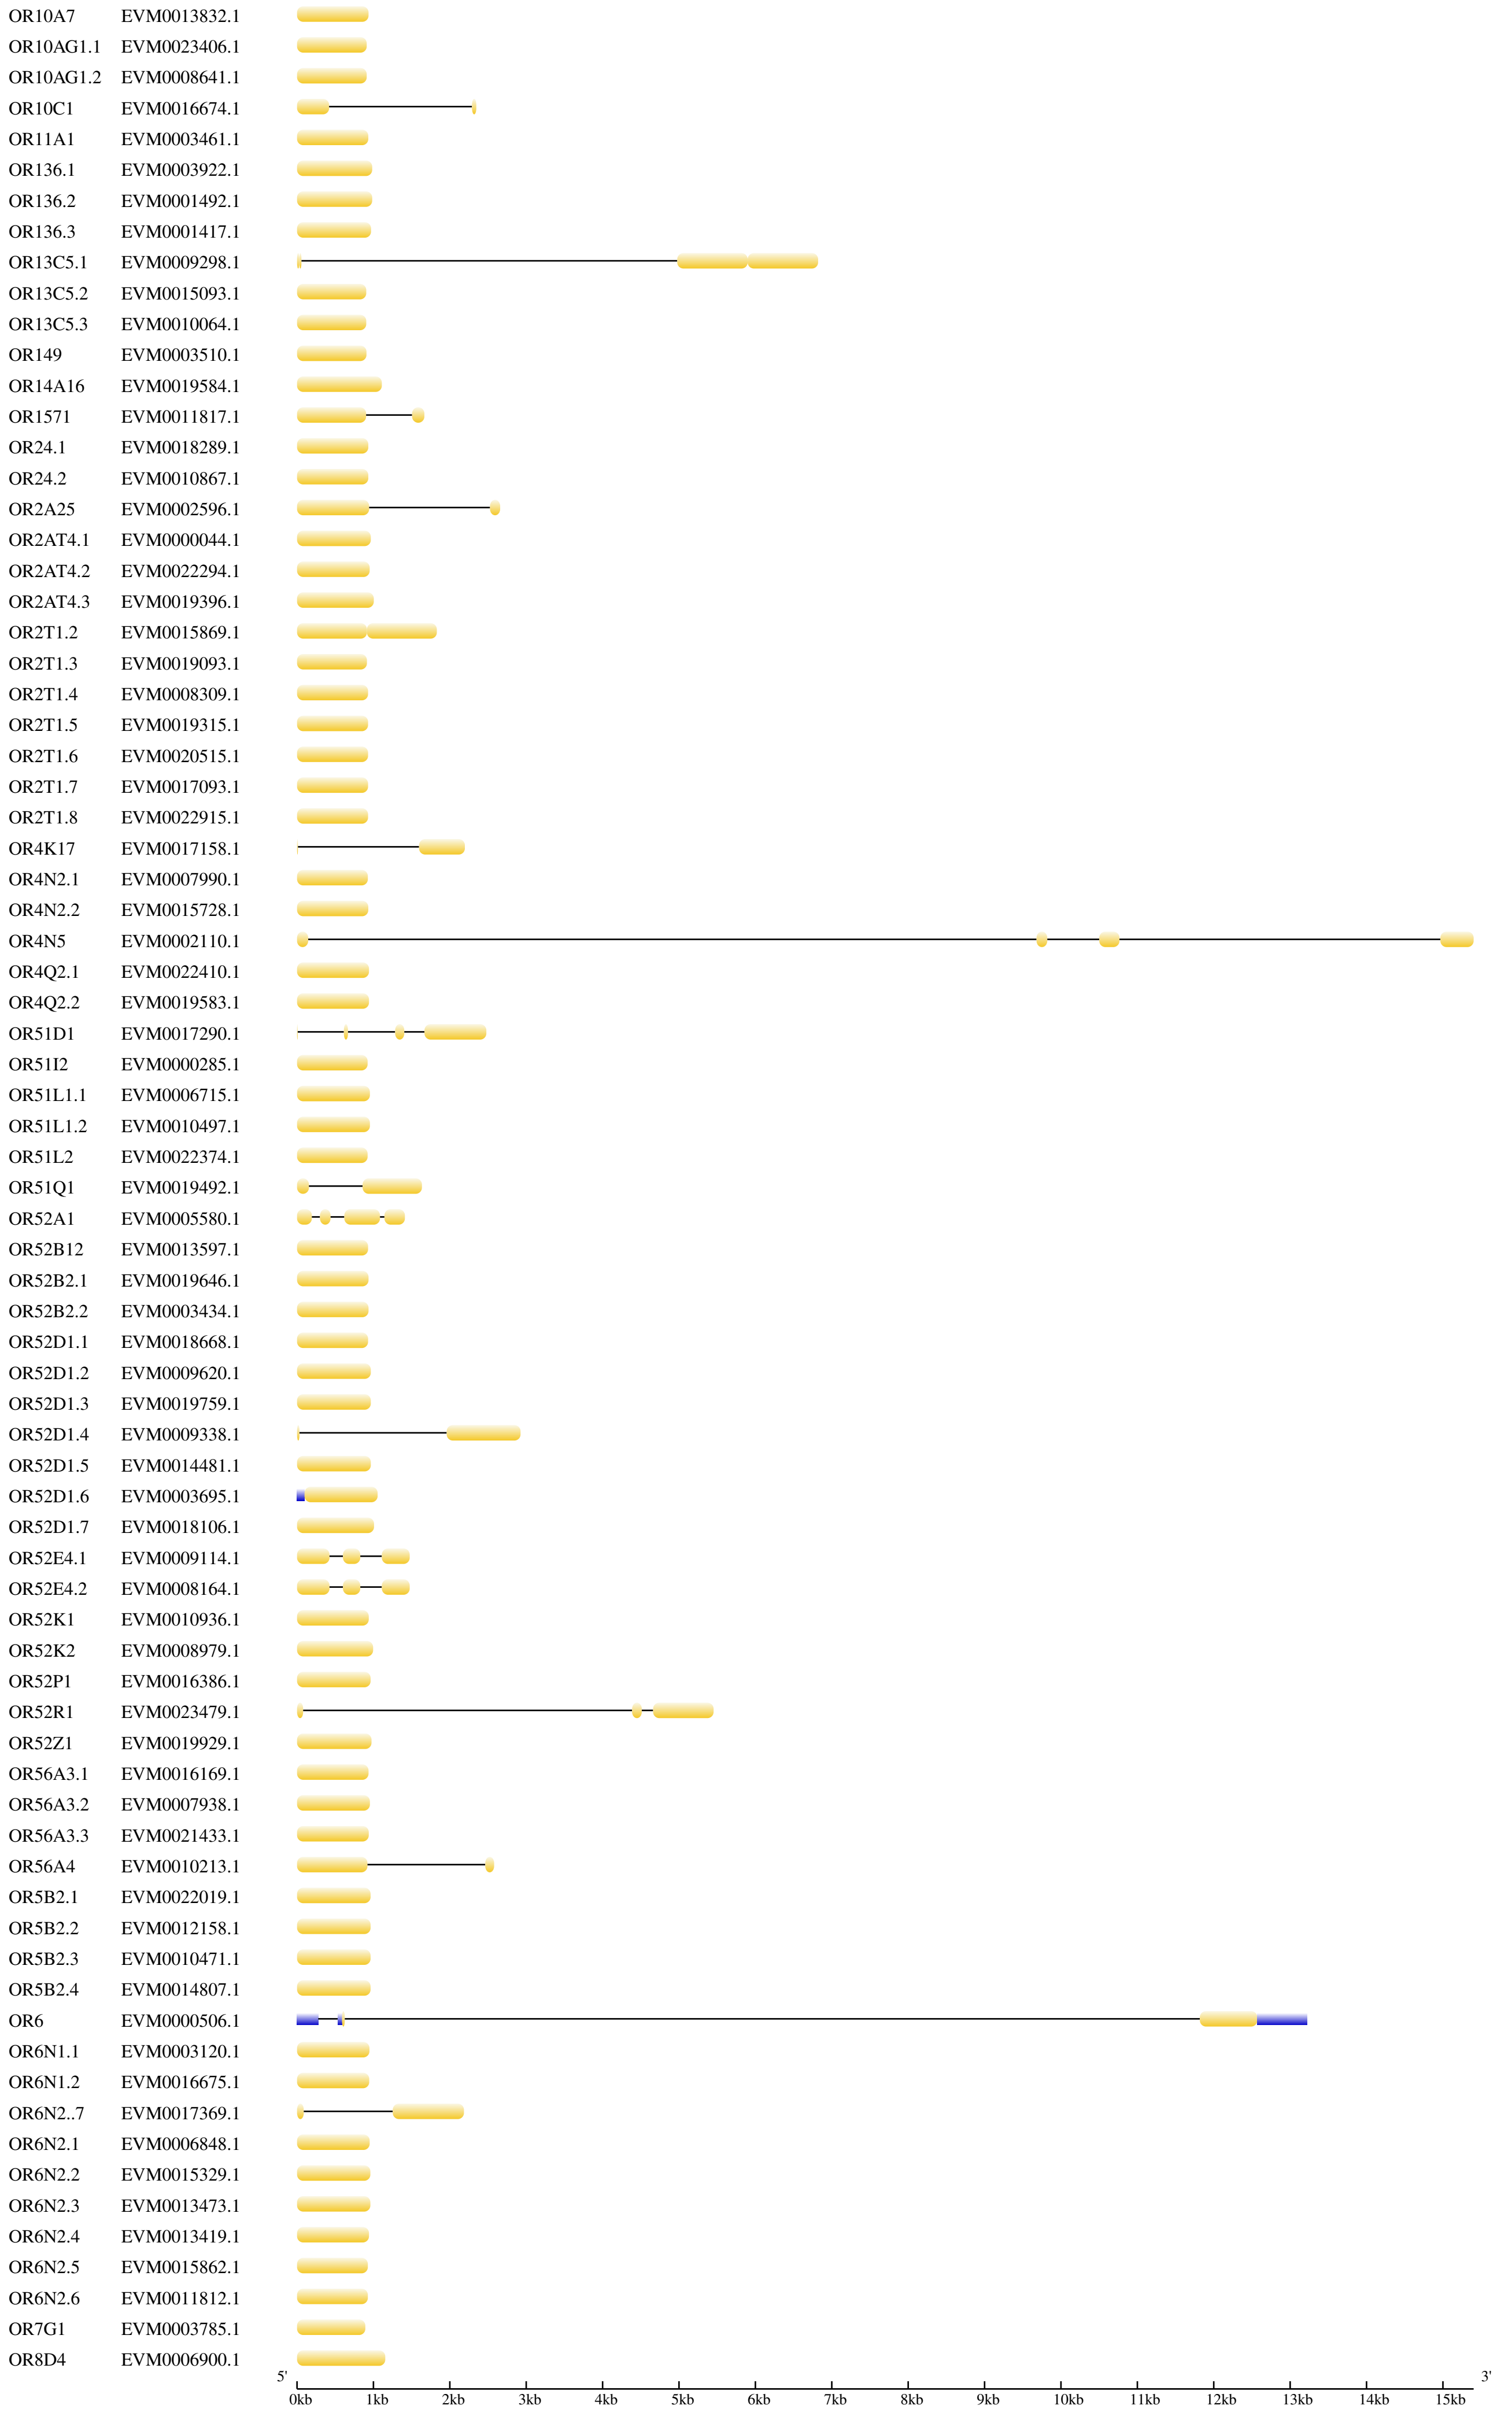

Legend:  
 CDS    UTR    Intron

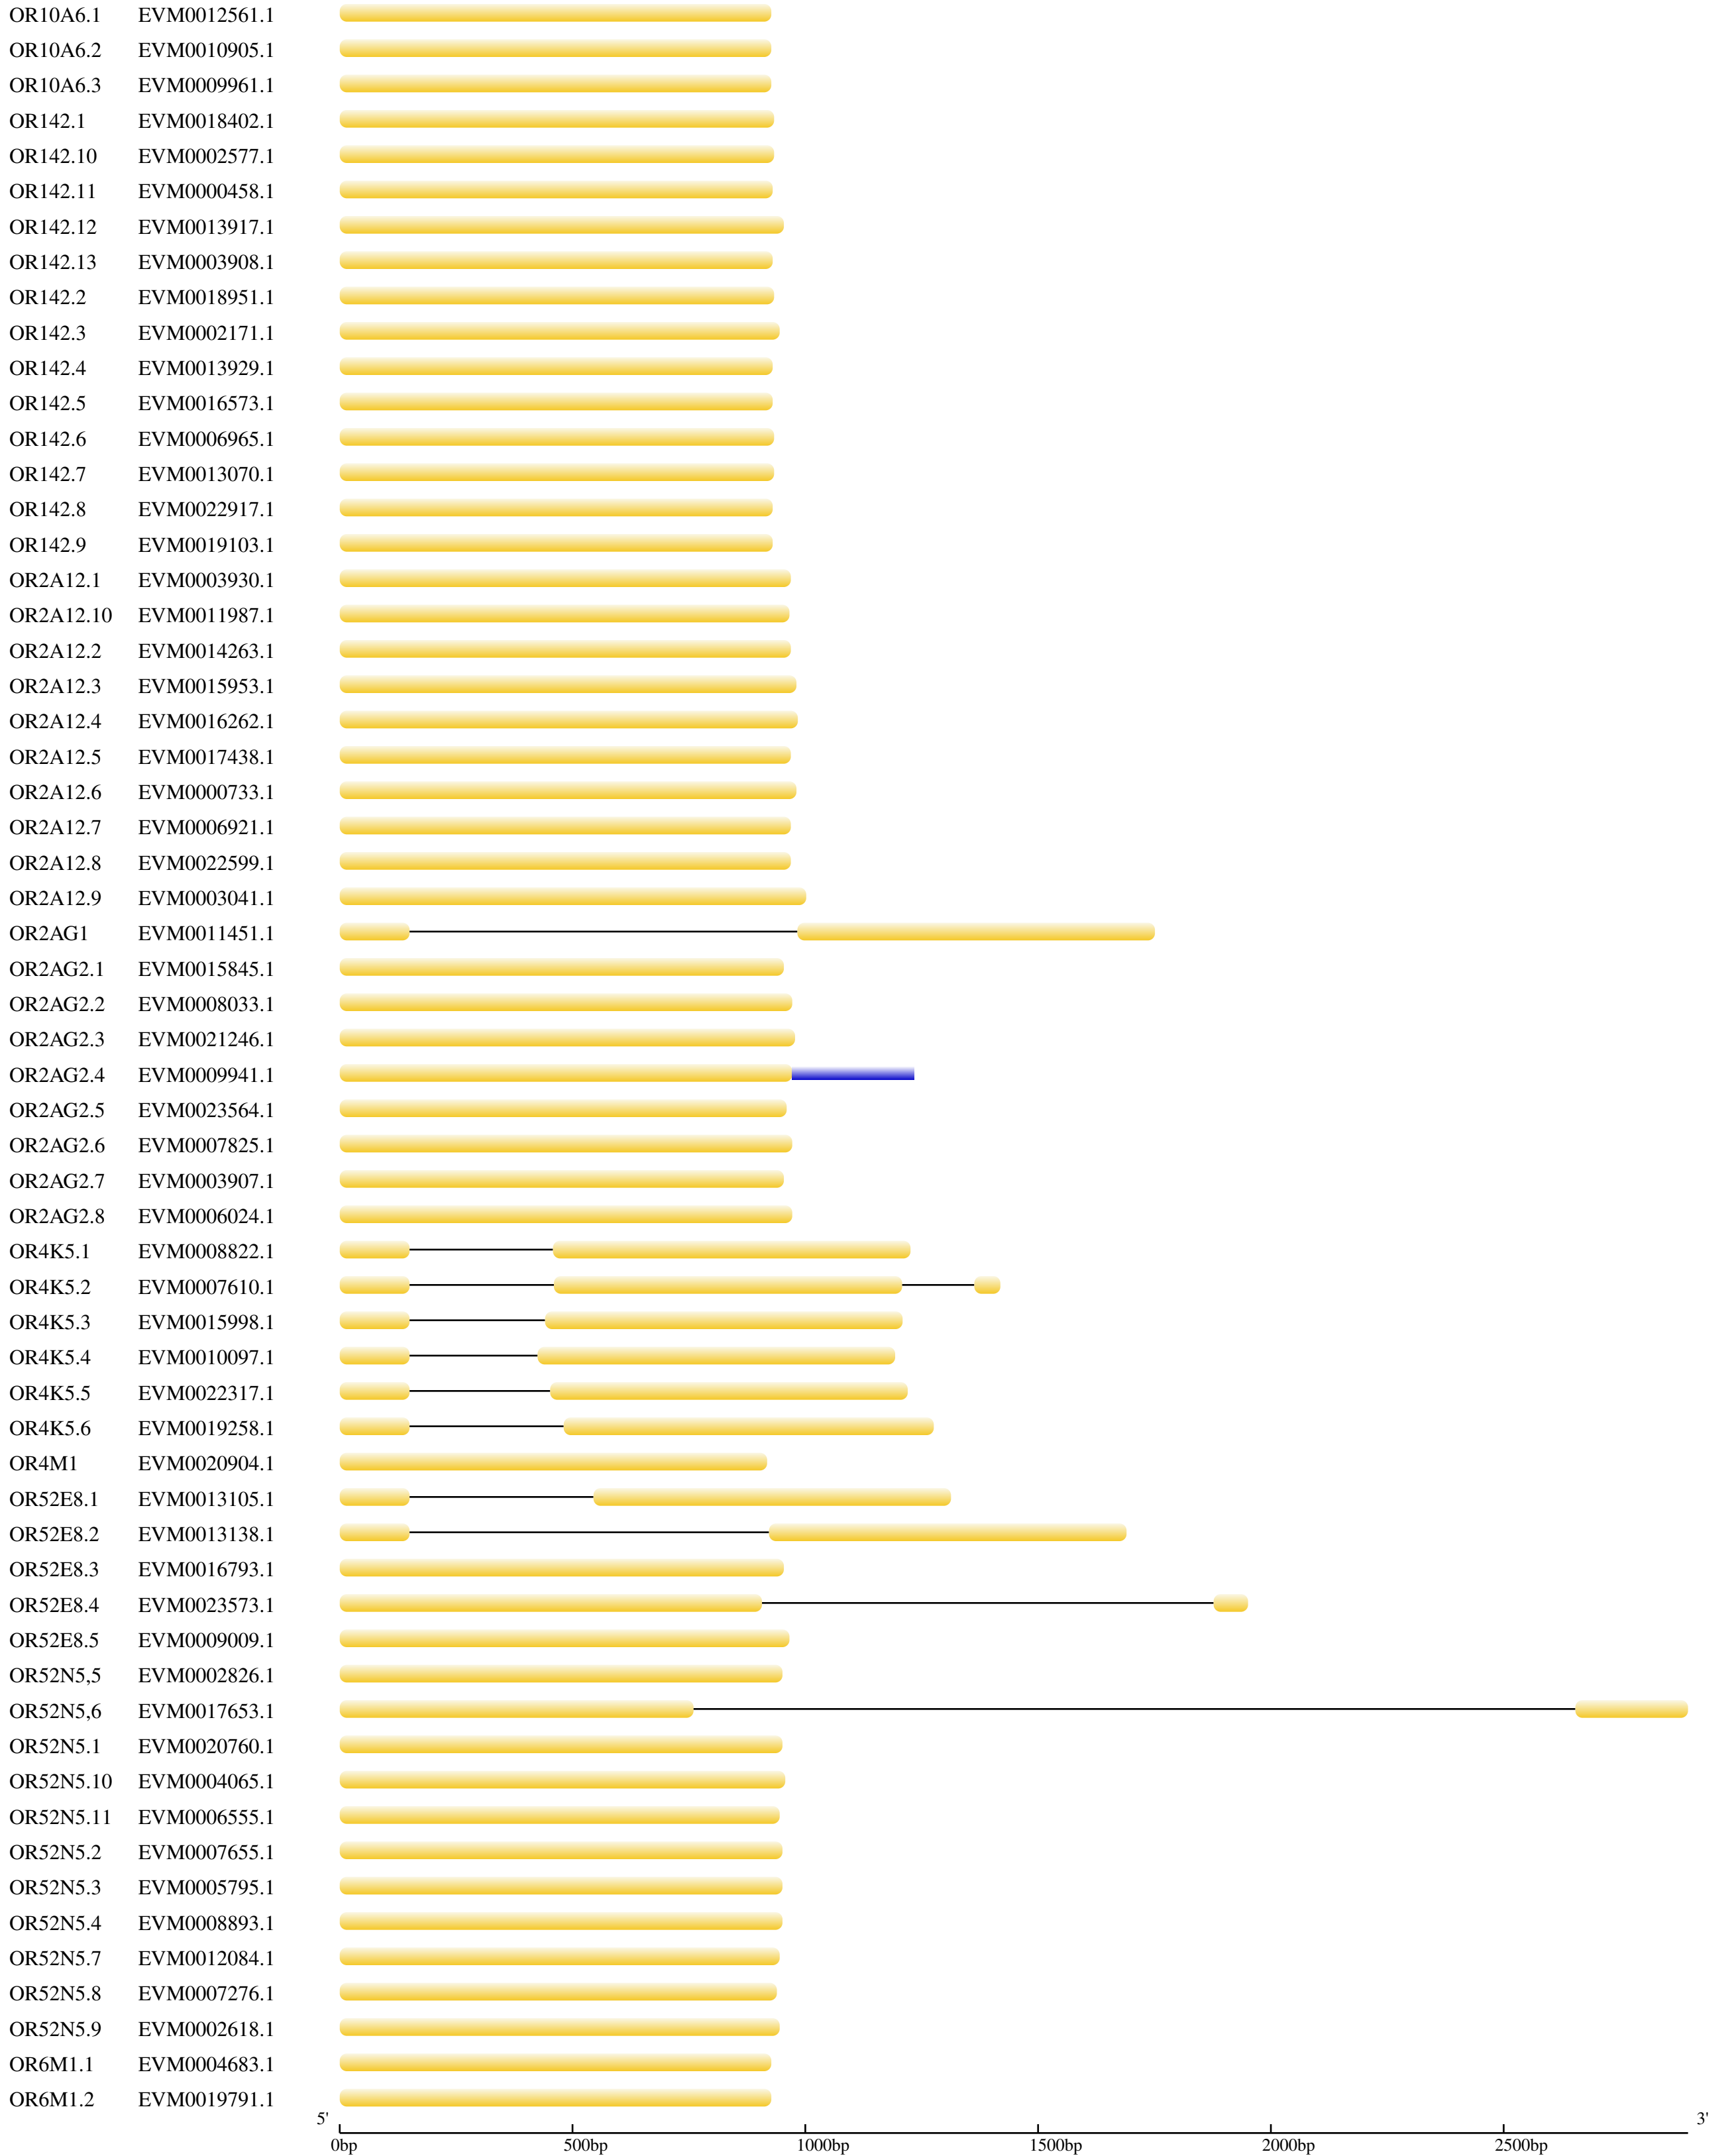

Legend:  
CDS UTR Intron

Supplement: s1 [file s1]
